# STATE-LEVEL COVID-19 TREND FORECASTING USING MOBILITY AND POLICY DATA

Yifei Wang<sup>+</sup>, Hao (Michael) Peng<sup>\*</sup>, Long Sha<sup>+</sup>, Zheyuan Liu<sup>+</sup>, Pengyu Hong<sup>+</sup>

<sup>+</sup>Department of Computer Science

Brandeis University

Waltham, MA 02453, USA

{yifeiwang, longsha, zheyuanliu, hongpeng}@brandeis.edu

<sup>\*</sup>Andover High School

80 Shawsheen Rd.

Andover, MA 01810

michael@mcmoo.org

## ABSTRACT

1 The importance of pandemic forecast cannot be overemphasized. We propose an  
2 interpretable machine learning approach for forecasting pandemic transmission  
3 rates by utilizing local mobility statistics and government policies. A calibration  
4 step is introduced to deal with time-varying relationships between transmission  
5 rates and predictors. Experimental results demonstrate that our approach is able  
6 to make accurate two-week ahead predictions of the state-level COVID-19 infec-  
7 tion trends in the US. Moreover, the models trained by our approach offer insights  
8 into the spread of COVID-19, such as the association between the baseline trans-  
9 mission rate and the state-level demographics, the effectiveness of local policies  
10 in reducing COVID-19 infections, and so on. This work provides a good under-  
11 standing of COVID-19 evolution with respect to state-level characteristics and can  
12 potentially inform local policymakers in devising customized response strategies.

## 13 1 INTRODUCTION

14 The novel coronavirus disease 2019 (COVID-19) has caused a global pandemic (Zhu et al., 2020)  
15 and imposes unprecedented challenges on governments and societies around the world. The  
16 COVID-19 outbreak has two key features: high covertness and high transmissibility (Hao et al.,  
17 2020), which have pushed some healthcare systems to the brink of collapse and have prompted gov-  
18 ernments to impose strict policies on physical isolation and travel restrictions so as to mitigate the  
19 spread of COVID-19. It is hence essential to accurately predict the spread of COVID-19. Such  
20 research, especially research on local trend forecasting, can provide valuable insights to help local  
21 authorities prepare their health systems and deploy appropriate policies to mitigate the spread.

22 Conventional mathematical modelling of infectious diseases in epidemiology, such as compartmen-  
23 tal models (Kermack & McKendrick, 1927) and their derivatives (Hao et al., 2020; Croccolo &  
24 Roman, 2020; Palladino et al., 2020), have been used to reconstruct and forecast transmission dy-  
25 namics at macro levels. Such a model usually builds an ODE system in a top-down way to ap-  
26 proximate the epidemic process and estimate model parameters via Monte Carlo methods. Accurate  
27 domain knowledge is required to design appropriate compartments as well as their relationships.

28 It is highly desired to develop models that not only capture dynamic relationships between infectious  
29 data and population but also make accurate forecasts on the spread of the disease. Oliver et al. (2020)  
30 argued that human behavior, especially mobility and physical co-presence, was necessary for spread  
31 analysis during all stages of a pandemic life cycle. Thanks to the pervasive mobile devices, in-time  
32 mobility statistics can now be obtained at a large scale. In fact, mobility information had been  
33 successfully used in building epidemiological models for H1N1 flu outbreaks (Balcan et al., 2009).  
34 This work estimates the reproduction number based on high-quality population mobility patterns, so  
35 as to make up missing incidence data during the early phase of the H1N1 pandemic. It was able to

36 uncover the seasonal transmission potential of H1N1 in affected countries at the early stage, using  
37 mobility and transportation data worldwide in addition to the raw count of cases.

38 **Present work.** In this work, we tackle the problem of forecasting the state-level daily new cases of  
39 COVID-19 in the US. We have developed a machine learning approach to estimate the state-level  
40 daily transmission rates via robust regression on local mobility statistics and government policies.  
41 The predicted daily transmission rates can then be accumulated to estimate the daily new cases.  
42 There are temporal variances in population behaviors (e.g., awareness of conditions relating to pub-  
43 lic health, compliance to policies, etc.), which, if not considered, can greatly affect the performance  
44 of our approach. To deal with this problem, we added a novel calibration step to our modeling,  
45 which assumes the relationships between the transmission rate variable and its predictors remain  
46 unchanged within a short time window. Empirical studies show that our approach can make sat-  
47 isfying predictions two weeks into the future for most states. Furthermore, our approach is well  
48 interpretable and offers insights into the spread of this pandemic. For example, we show that the  
49 baseline transmission rate, which is indicated as the bias terms in our trained models, is highly  
50 associated with state-level demographics. In addition, the factors identified to be significant in mak-  
51 ing predictions are quite consistent across states with how people and governments fight against  
52 COVID-19.

## 53 2 RELATED WORK

54 Previous works on COVID-19 trend prediction can be roughly categorized into the following two  
55 types.

56 **Compartmental models.** Most recent approaches for COVID-19 spread analysis in epidemiology  
57 are derivatives of the *Susceptible Infectious Recovered* (SIR) model (Kermack & McKendrick, 1927;  
58 Harko et al., 2014), a widely used compartmental model. These approaches group the subjects in  
59 the system of interest into different population compartments when modeling epidemic spread. The  
60 dynamics of the system is characterized by the transitions of subjects between compartments, which  
61 are mathematically expressed as a set of differential equations. Croccolo & Roman (2020) extended  
62 the SIR model to encompass the effects of lockdown policy and applies it to COVID-19 in the US.  
63 Palladino et al. (2020) improved the standard SIR model to have a varying diffusion velocity of  
64 virus, which accounts for nonpharmaceutical interventions, and applied the model to COVID-19  
65 in Italy. In another work, Hao et al. (2020) proposed a SAPHIRE model that contains seven com-  
66 partments (susceptible, exposed, presymptomatic infectious, ascertained infectious, unascertained  
67 infectious, isolation in hospital and removed) to reconstruct transmission dynamics of COVID-19 in  
68 Wuhan, China between 01/01/2020 and 08/03/2020. This time period was divided into 5 segments  
69 (Pan et al., 2020), in each of which, the ascertainment rate and transmission rate were assumed to be  
70 fixed. They also assumed a constant population size and a constant number of travellers in each pe-  
71 riod. Fernández-Villaverde & Jones (2020) incorporated social distancing into a SIRD (Susceptible-  
72 Infectious-Recovered-Dead) model that allows a time-varying contact rate so as to capture changes  
73 associated with social distancing and quarantine policy. They conducted simulations of deaths on  
74 various regions, such as New York City, Italy, Sweden and Spain. Picchiotti et al. (2020) built  
75 a SEIR (Susceptible-Exposed-Infected-Recovered) model that considers both personal protective  
76 measures and mobility restrictions represented as decreasing logistic functions. Chang et al. (2020)  
77 introduced a metapopulation SEIR model that integrated fine-grained, dynamic mobility networks  
78 to simulate the spread of SARS-CoV-2 in 10 of the largest US metropolitan statistical areas. The  
79 IHME COVID-19 Forecasting Team (2020) proposed a deterministic SEIR framework to model  
80 possible trajectories of COVID-19 infections and the effects of non-pharmaceutical interventions in  
81 the US at the state level. Dandekar & Barbastathis (2020) augmented the SIR model to include a  
82 time varying quarantine strength term, which is learned by a neural network from real data. Yang  
83 et al. (2020b) compared a set of SIR based models (e.g., SIR, SEIR, SEIR-AHQ (Tang et al., 2020),  
84 SEIR-QD (Peng et al., 2020), SEIR-PO (proposed), etc.) on their forecast abilities using the daily  
85 reported confirmed infected case data from the China CDC. It is evident that most compartmental  
86 models focus on dynamics reconstruction and lack the ability to make long-term predictions.

87 **Machine learning models.** Machine learning approaches are very capable of learning complex  
88 dynamic patterns and relationships directly from data. Punn et al. (2020) and Tuli et al. (2020)  
89 applied machine learning techniques (e.g., support vector regression, polynomial regression, robust

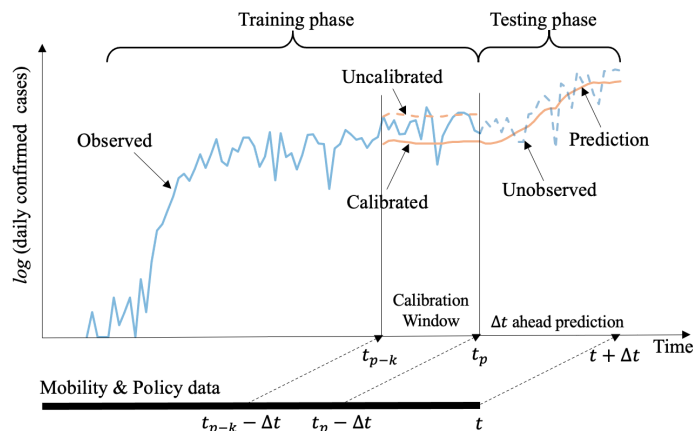

Figure 1: **Illustration of the proposed approach for predicting the state-level spread of COVID-19.** The  $x$ -axis represent time. The  $y$ -axis represents the number of daily cases in logarithmic scale. Our approach makes  $\Delta t$ -ahead predictions, starting at time  $t_p$ , using the state-level daily mobility statistics and policies. The model calibration is done using the daily confirmed case data within the time window  $[t_{p-k}, t_{p-1}]$ .

90 Weibull fitting, etc.) to fit the nationwide epidemic curve without considering any exogenous factors.  
 91 Yang et al. (2020a) proposed a GRU-based framework for state-level trend prediction, integrating  
 92 the time-varying epidemic information with environmental factors. This work incorporated static  
 93 external factors including local population and age structure while ignoring dynamic population  
 94 behaviors. Kapoor et al. (2020) developed a GNN-based approach for county-level COVID-19  
 95 forecasting, where Google’s human mobility data across all counties in the US are represented as a  
 96 single large-scale spatio-temporal graph. Nevertheless, it did not consider other significant external  
 97 factors (e.g., mandatory or voluntary mask policies). Ramchandani et al. (2020) divided county-level  
 98 weekly rises of confirmed COVID-19 cases into 4 coarse categories and developed DeepCOVIDNet  
 99 based on the DeepFM (Guo et al., 2017) framework that used the demographic statistics and cross-  
 100 county mobility data provided by SafeGraph to make coarse-level predictions.

### 101 3 RESULTS

102 We applied our approach to predict the state-level infection trends of COVID-19 in the US. The  
 103 results reveal the interaction between the spread of COVID-19 and the state-level mobility factors  
 104 and restriction policies. In addition, we show that our approach learns the “bias” linked to state-level  
 105 demographic characteristics.

#### 106 3.1 STATE-LEVEL EPIDEMIC FORECASTING MODEL

107 Our approach (Figure 1) trains a model in a pure data-driven manner for each state in the US, includ-  
 108 ing the District of Columbia (DC), to make  $\Delta t$ -ahead prediction of the state-level daily transmission  
 109 rate  $\hat{r}_{t+\Delta t}$  using the state-level daily mobility statistics and government policies at time  $t$ . The es-  
 110 timated daily confirmed cases in this state can then be derived from the corresponding estimated  
 111  $\hat{r}_t$  in an accumulated manner. Furthermore, a calibration step is proposed to adjust for short-term  
 112 changes in population behaviors. We abuse the term “state” a little bit to indicate a state or the DC  
 113 throughout the paper. The hyper-parameter  $\Delta t$  specifies how far in the future a prediction is made,  
 114 and is automatically adjusted for each state. The detailed description of the model is provided in  
 115 Appendix A. The following lists the data used in this work:

- 116 • **COVID-19 daily confirmed case data:** The latest COVID-19 daily cases data was ob-  
 117 tained from The New York Times<sup>1</sup>.

<sup>1</sup><https://github.com/nytimes/covid-19-data>

- 118 • **State-level mobility data:** The trip-by-distance mobility data is made available by the  
119 Maryland Transportation Institute and Center for Advanced Transportation Technology  
120 Laboratory at the University of Maryland<sup>2</sup>. The daily trips are grouped into 10 categories  
121 based on the travel distances and another *Staying-at-home* category indicates the ratio of  
122 population mostly at home.
- 123 • **State restriction policy:** The information about state-level restrictions were extracted from  
124 "The Coronavirus Outbreak" forum on the New York Times<sup>3</sup>. This work considers the  
125 mask policy and the restaurant restriction policy.
- 126 • **State-level demographic information:** This data includes the state-level population den-  
127 sity information published by the U.S. Census Bureau<sup>4</sup>, the race structure information (frac-  
128 tion of 7 different race categories) collected by the COVID Tracking Project<sup>5</sup>, and the age  
129 structure information (fraction of 6 non-overlapping age groups as well as the high risk  
130 population) collected by the Kaiser Family Foundation<sup>6</sup>.

131 The whole dataset contains the daily confirmed cases (01/21/2020 – 12/08/2020) in the 51 states of  
132 the US. The data was split into a training set (01/21/2020 – 11/24/2020) and a test set (11/25/2020  
133 – 12/08/2020). Fifty states issued the restaurant policies, and 34 states issued the public mask  
134 policies. For each state, we fit a model using the train data starting from its pandemic start date to  
135 11/24/2020. The pandemic start date of a state is decided in the way discussed in Section A.1. The  
136 only hyper-parameter of the model is  $\Delta t$ , which is related to the incubation time of COVID-19 and  
137 the efficiency of a state's healthcare system. The typical incubation period for COVID-19 is around  
138 14 days according to the CDC. Since there were delays in taking tests and reporting cases, we limited  
139  $\Delta t$  to between 15 and 20, and applied ten-fold cross-validation using the training data to determine  
140 the optimal  $\Delta t$  of each state. In the test phase, we first smoothed the predicted transmission rate,  
141  $\log \hat{r}_t$ , by taking an exponential moving average on the previous 3 days. Then we conduct the  
142 calibration step (see Section A.3) using the data between 11/18/2020 and 11/24/2020.

### 143 3.2 PREDICTION EVALUATION METRICS

We evaluate the prediction performance based on normalized RMSE (nRMSE):

$$\text{nRMSE} = \frac{\text{RMSE}(\log \hat{D}_{[t_p: t_p+m]}, \log D_{[t_p: t_p+m]})}{\text{Median}(\log D_{[t_p: t_p+m]})}$$

where the prediction period is  $[t_p, t_p + m]$ ,  $m$  is set to be no more than 14 in this work,  $\log D_{[t_p: t_p+k]}$   
indicates the logarithm of the daily confirmed cases between  $t_p$  and  $t_p + m$ , and  $\log \hat{D}_{[t_p: t_p+m]}$  indi-  
cates the logarithm of the predicted daily confirmed cases. nRMSE estimates the relative deviation  
from the the local COVID-19 trend. A value of 0.01 represents the average prediction deviates 1%  
from the true local trend in a logarithmic scale. We also report the relative accumulated log error  
(RALE) of cases during  $[t_p, t_p + m]$ :

$$\text{RALE} = \frac{|\sum(\log \hat{D}_{[t_p: t_p+m]} - \log D_{[t_p: t_p+m]})|}{\sum(\log D_{[t_p: t_p+m]})}$$

144 RALE captures the relative deviation from the accumulated cases within  $m$  days. A value of 0.01  
145 represents the predictive cases deviates 1% from the true cases within  $m$  days in a logarithmic scale.

<sup>2</sup><https://data.bts.gov/Research-and-Statistics/Trips-by-Distance/w96p-f2qv>

<sup>3</sup><https://www.nytimes.com/interactive/2020/us/states-reopen-map-coronavirus.html>

<sup>4</sup><https://www.census.gov>

<sup>5</sup><https://covidtracking.com>

<sup>6</sup><https://www.kff.org/other/state-indicator/distribution-by-age/?currentTimeframe=0&sortModel=%7B%22colId%22:%22Location%22,%22sort%22:%22asc%22%7D%23notes>

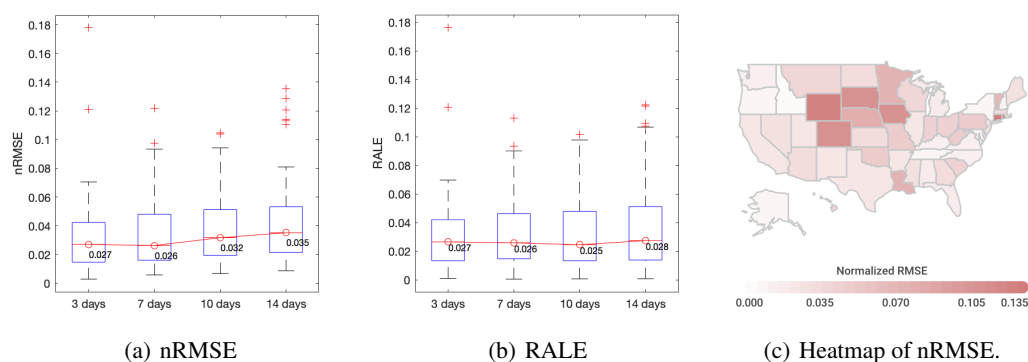

Figure 2: The summary of the 3-, 7-, 10- and 14-day state-level forecasting performance. (a) The state-level nRMSE values. (b) The state-level RALE values. (c) The geographic heatmap of the 14-day forecasting nRMSE.

### 146 3.2.1 SUMMARY OF THE PREDICTION PERFORMANCE

147 We ran our approach to make the 3-, 7-, 10- and 14-day predictions in all states. The results are  
148 summarized in Figure 2 with details in Table 2. The median nRMSE for 14-day forecasting is 0.035  
149 (i.e., the prediction deviates  $\approx 3.5\%$  from the real local trend at a logarithmic scale). Most nRMSEs  
150 of the 14-day forecasting results are within 0.05, indicating that our model works well for most  
151 states in the US. The RALE results show a similar trend. We observe that both nRMSE and RALS  
152 increase slightly with the forecasting time extends. For instance, the median values of the 3- and  
153 14-day nRMSEs are 0.027 and 0.035, respectively. Figure 3 visualizes the 14-day predictions (both  
154 the transmission rates and the daily confirmed cases) of two states, NY (nRMSE = 0.0105, RALE  
155 = 0.0036) and LA (nRMSE = 0.0755, RALE = 0.0710). The prediction results on NY and LA are  
156 among the best and worst, respectively.

157 We should point out that a large nRMSE or RALE may indicate large volatility in the confirmed  
158 daily cases due to delay in reporting, rather than the weak performance of the corresponding model.  
159 Figure 10 shows four representative states that contain significant volatilities in daily confirmed  
160 cases in or after the forecasting period (11/25/2020 – 12/08/2020). However, their overall future  
161 trends match our forecasting curves very well.

### 162 3.3 SIGNIFICANT FACTORS IN PREDICTING COVID-19 TREND

163 The predictors have different levels of effects on COVID-19 trend prediction across the US (see  
164 Figure 4b-f, with more details in Figure 8). Using 0.05 as the  $p$ -value cutoff, we observed several  
165 factors are frequently identified as significant across the states (Figure 4a). *Mask Policy* has the  
166 highest frequency of 0.7647 (26 out of 34 states that issued the mask policy), indicating that the  
167 mask policy has the most impact on the change of epidemic dynamics. The estimated coefficients  
168 of *Mask Policy* and three other significant factors (*Restaurant Policy*, *Stay-at-home* and *Dis-0-1*) are  
169 negative in nearly all cases (Appendix B), which indicates these factors help hamper the spread of  
170 COVID-19. This is consistent with how people and governments fight against COVID-19: wearing  
171 masks, closing restaurants and staying at home. Mobility categories *Dis-1-3* and *Dis>500* also have  
172 general impacts. However, their estimated coefficients are positive in most cases, indicating that  
173 they help promote the spread of COVID-19. We suspect that *Dis-1-3* may correspond to walking  
174 within local communities and that *Dis>500* mostly represents cross-state travels.

175 Interestingly, other mobility categories become significant for a few states. For example, the long  
176 distance mobility categories (*Dis-250-500* and *Dis>500*) are both significant in regression for states  
177 NV and MT. This might be explained by the low population densities in those states. There may be  
178 other very complex interactions between mobility and demographic properties, which we leave for  
179 future exploration.

Preprint.

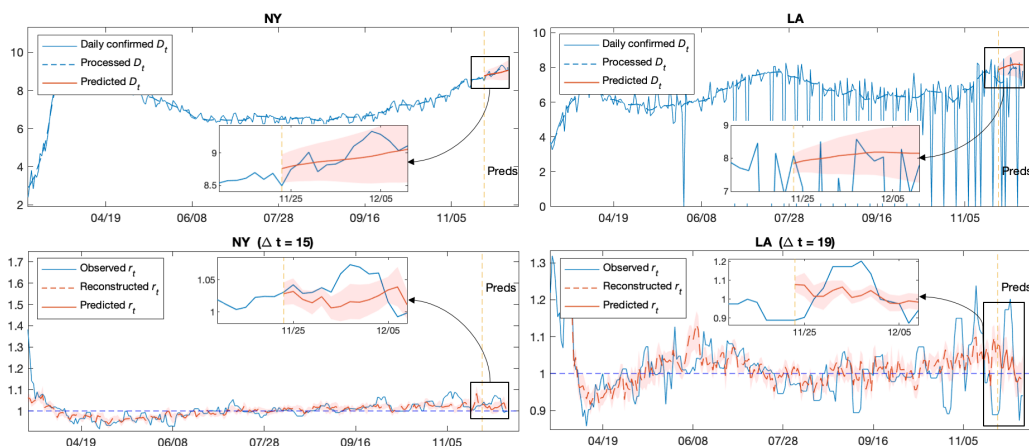

Figure 3: The 14-day predictions of the COVID-19 transmission rates and daily cases in NY (nRMSE = 0.0105, RALE = 0.0036) and LA (nRMSE = 0.0755, RALE = 0.0710) in logarithmic scale. All  $x$ -axis indicate time. The  $y$ -axes in the top plots indicate the logarithm of the daily confirmed cases. The  $y$ -axes in the bottom plots indicate the transmission rate values. The yellow dash vertical lines indicate the starting points of the prediction periods. The blowouts highlight the predictions. The red shaded areas indicate the 95% confidence intervals.

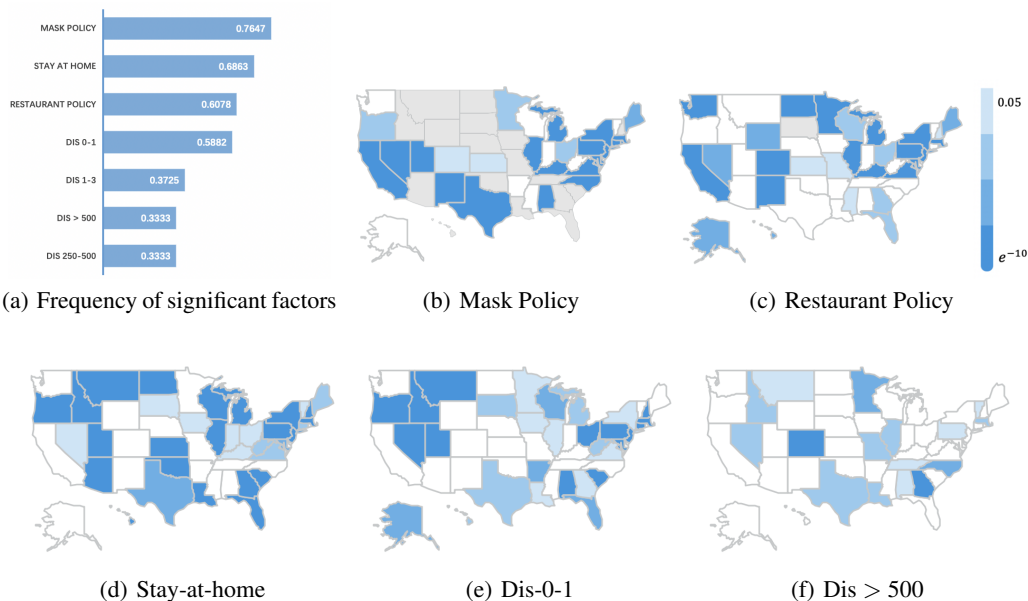

Figure 4: (a) Frequency of each factor identified to be significant within states. Factor with high frequency implies its general influences on most states. (b)–(f) Heatmaps of each factor’s p-values. Here a state is colored grey if it doesn’t incorporate such factor into regression. Remaining results are also reported in Figure 8 in the Appendix.

180 3.4 DEMOGRAPHIC INTERPRETATION OF THE STATE-LEVEL BIASES IN COVID-19  
181 TRANSMISSION

182 We trained one daily case prediction model for each state (including the DC) and obtained 51 models  
183 in total. Notice that the intercept term in each model represents the baseline transmission rate of the  
184 corresponding state. We hypothesized that the differences in the baseline transmission rates were  
185 due to the state-level demographics (e.g., population density, age structure, race structure, etc.).

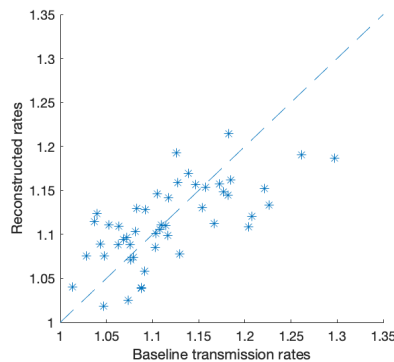

Figure 5: Daily transmission rate is estimated by time-dependent mobility variables as well as categorical variables for policies. Then daily cases are predicted from previous transmission rates. The biased term (intercept) from the regression model is the baseline transmission rate under normal mobility and conditions before the pandemic. The baseline rate is highly related to each state's demographics.

186 To investigate this, we used lasso (Tibshirani, 1996) to select four demographic variables highly  
187 related to the state-level model biases, which include *Top Density*<sup>7</sup> ( $p$ -value = 0.0293), *Adults-35-54*  
188 ( $p$ -value = 0.1003), *Hispanic-Or-Latino* ( $p$ -value = 0.0112) and *AmericanIndian-Or-AlaskaNative*  
189 ( $p$ -value = 0.1507). We then used them to reconstruct the baseline transmission rates using non-  
190 regularized linear regression (see Table 1 and Figure 5). Our findings resonate with the findings in  
191 previous works that the spread of COVID-19 were highly relevant to population densities (Rocklöv  
192 & Sjödin, 2020) and ethnic minorities (Dyer, 2020; Kirby, 2020), and hence aid in understanding  
193 the spread of COVID-19 and increase the interpretability of our model.

## 194 4 CONCLUSIONS

195 In this paper, we propose a data-driven approach that trains regression models for forecasting the  
196 state-level COVID-19 daily transmission rates using the state-level mobility data and restrictive  
197 policies. The transmission rates can then be used to estimate the daily confirmed cases in an accu-  
198 mulated manner. Our approach uses a calibration step to adjust for short-term changes in population  
199 behaviors. Our empirical study results show that the proposed approach can reliably and accurately  
200 forecast (2 weeks ahead) the state-level COVID-19 spread. We also studied statistically significant  
201 factors as well as their impacts on the COVID-19 pandemic, and the findings allow us to better  
202 understand how population mobility and government policies may affect the spread of COVID-19.  
203 Our prediction results can be used by local governments or healthcare systems to prepare ahead,  
204 and the discovered quantitative relationships between COVID-19 and population mobility as well as  
205 policies can be used to by policymakers in devising customized response strategies.

## 206 CODE AND DATA AVAILABILITY

207 Our codes and the data used in this work are available on GitHub at [https://github.com/  
208 yifeiwang15/COVID-19-Mobility](https://github.com/yifeiwang15/COVID-19-Mobility).

## 209 AUTHOR CONTRIBUTIONS

210 Yifei Wang developed the whole model architecture, planned and carried out the experiments, and  
211 mainly wrote the manuscript. Pengyu Hong initialized this project, conceived of the presented  
212 idea, supervised the experiments and revised the manuscript. Michael Peng did data extraction as  
213 well as data filtering and helped improve the manuscript. Michael Peng and Frank Liu developed  
214 a website (<https://broad-well.github.io/covid-trend-prediction/>) to visu-  
215 alize our predictions on all states. Long Sha participated in brainstorming and discussions.

<sup>7</sup>The highest population density within state.

216 ACKNOWLEDGMENTS

217 This work was partially supported by NSF OAC 1920147.

218 COMPETING INTERESTS STATEMENT

219 The authors declare no competing interest.

220 REFERENCES

- 221 Duygu Balcan, Hao Hu, Bruno Goncalves, Paolo Bajardi, Chiara Poletto, Jose J Ramasco, Daniela  
222 Paolotti, Nicola Perra, Michele Tizzoni, Wouter Van den Broeck, et al. Seasonal transmission  
223 potential and activity peaks of the new influenza a (h1n1): a monte carlo likelihood analysis  
224 based on human mobility. *BMC medicine*, 7(1):45, 2009.
- 225 Serina Chang, Emma Pierson, Pang Wei Koh, Jaline Gerardin, Beth Redbird, David Grusky, and  
226 Jure Leskovec. Mobility network models of covid-19 explain inequities and inform reopening.  
227 *Nature*, pp. 1–6, 2020.
- 228 Fabrizio Croccolo and H Eduardo Roman. Spreading of infections on random graphs: A percolation-  
229 type model for covid-19. *Chaos, Solitons & Fractals*, 139:110077, 2020.
- 230 Raj Dandekar and George Barbastathis. Quantifying the effect of quarantine control in covid-19  
231 infectious spread using machine learning. *medRxiv*, 2020.
- 232 Owen Dyer. Covid-19: Black people and other minorities are hardest hit in us, 2020.
- 233 Chao Fan, Sanghyeon Lee, Yang Yang, Bora Oztekin, Qingchun Li, and Ali Mostafavi. Effects  
234 of population co-location reduction on cross-county transmission risk of covid-19 in the united  
235 states. *arXiv preprint arXiv:2006.01054*, 2020.
- 236 Jesús Fernández-Villaverde and Charles I Jones. Estimating and simulating a sird model of covid-19  
237 for many countries, states, and cities. Technical report, National Bureau of Economic Research,  
238 2020.
- 239 Huifeng Guo, Ruiming Tang, Yunming Ye, Zhenguo Li, and Xiuqiang He. Deepfm: a factorization-  
240 machine based neural network for ctr prediction. *arXiv preprint arXiv:1703.04247*, 2017.
- 241 Xingjie Hao, Shanshan Cheng, Degang Wu, Tangchun Wu, Xihong Lin, and Chaolong Wang. Re-  
242 construction of the full transmission dynamics of covid-19 in wuhan. *Nature*, 584(7821):420–424,  
243 2020.
- 244 Tiberiu Harko, Francisco SN Lobo, and MK Mak. Exact analytical solutions of the susceptible-  
245 infected-recovered (sir) epidemic model and of the sir model with equal death and birth rates.  
246 *Applied Mathematics and Computation*, 236:184–194, 2014.
- 247 Paul W Holland and Roy E Welsch. Robust regression using iteratively reweighted least-squares.  
248 *Communications in Statistics-theory and Methods*, 6(9):813–827, 1977.
- 249 Amol Kapoor, Xue Ben, Luyang Liu, Bryan Perozzi, Matt Barnes, Martin Blais, and Shawn  
250 O’Banion. Examining covid-19 forecasting using spatio-temporal graph neural networks. *arXiv  
251 preprint arXiv:2007.03113*, 2020.
- 252 William Ogilvy Kermack and Anderson G McKendrick. A contribution to the mathematical theo-  
253 ry of epidemics. *Proceedings of the royal society of london. Series A, Containing papers of a  
254 mathematical and physical character*, 115(772):700–721, 1927.
- 255 Tony Kirby. Evidence mounts on the disproportionate effect of covid-19 on ethnic minorities. *The  
256 Lancet Respiratory Medicine*, 8(6):547–548, 2020.
- 257 Nuria Oliver, Bruno Lepri, Harald Sterly, Renaud Lambiotte, Sébastien Deletaille, Marco De Nadai,  
258 Emmanuel Letouzé, Albert Ali Salah, Richard Benjamins, Ciro Cattuto, et al. Mobile phone data  
259 for informing public health actions across the covid-19 pandemic life cycle, 2020.



- 260 Andrea Palladino, Vincenzo Nardelli, Luigi Giuseppe Atzeni, Nane Cantatore, Maddalena Cataldo,  
261 Fabrizio Croccolo, Nicolas Estrada, and Antonio Tombolini. Modelling the spread of covid19 in  
262 italy using a revised version of the sir model. *arXiv preprint arXiv:2005.08724*, 2020.
- 263 An Pan, Li Liu, Chaolong Wang, Huan Guo, Xingjie Hao, Qi Wang, Jiao Huang, Na He, Hongjie  
264 Yu, Xihong Lin, et al. Association of public health interventions with the epidemiology of the  
265 covid-19 outbreak in wuhan, china. *Jama*, 323(19):1915–1923, 2020.
- 266 Liangrong Peng, Wuyue Yang, Dongyan Zhang, Changjing Zhuge, and Liu Hong. Epidemic analysis  
267 of covid-19 in china by dynamical modeling. *arXiv preprint arXiv:2002.06563*, 2020.
- 268 Nicola Picchiotti, Monica Salvioli, Elena Zanardini, and Francesco Missale. Covid-19 pandemic:  
269 a mobility-dependent seir model with undetected cases in italy, europe and us. *arXiv preprint*  
270 *arXiv:2005.08882*, 2020.
- 271 Narinder Singh Punn, Sanjay Kumar Sonbhadra, and Sonali Agarwal. Covid-19 epidemic analysis  
272 using machine learning and deep learning algorithms. *medRxiv*, 2020.
- 273 Ankit Ramchandani, Chao Fan, and Ali Mostafavi. Deepcovidnet: An interpretable deep learning  
274 model for predictive surveillance of covid-19 using heterogeneous features and their interactions.  
275 *IEEE Access*, 8:159915–159930, 2020.
- 276 Joacim Rocklöv and Henrik Sjödin. High population densities catalyse the spread of covid-19.  
277 *Journal of travel medicine*, 27(3):taaa038, 2020.
- 278 SafeGraph. Places schema. [EB/OL]. Available: [https://docs.safegraph.com/docs/  
279 places-schema#](https://docs.safegraph.com/docs/places-schema#) Accessed Jul. 26, 2020.
- 280 Biao Tang, Xia Wang, Qian Li, Nicola Luigi Bragazzi, Sanyi Tang, Yanni Xiao, and Jianhong Wu.  
281 Estimation of the transmission risk of the 2019-ncov and its implication for public health inter-  
282 ventions. *Journal of clinical medicine*, 9(2):462, 2020.
- 283 IHME COVID-19 Forecasting Team. Modeling covid-19 scenarios for the united states. *Nature*  
284 *Medicine*, 2020.
- 285 Robert Tibshirani. Regression shrinkage and selection via the lasso. *Journal of the Royal Statistical*  
286 *Society: Series B (Methodological)*, 58(1):267–288, 1996.
- 287 Shreshth Tuli, Shikhar Tuli, Rakesh Tuli, and Sukhpal Singh Gill. Predicting the growth and trend of  
288 covid-19 pandemic using machine learning and cloud computing. *Internet of Things*, pp. 100222,  
289 2020.
- 290 Tong Yang, Long Sha, Justin Li, and Pengyu Hong. A deep learning approach for covid-19 trend  
291 prediction. *arXiv preprint arXiv:2008.05644*, 2020a.
- 292 Wuyue Yang, Dongyan Zhang, Liangrong Peng, Changjing Zhuge, and Liu Hong. Rational  
293 evaluation of various epidemic models based on the covid-19 data of china. *arXiv preprint*  
294 *arXiv:2003.05666*, 2020b.
- 295 Na Zhu, Dingyu Zhang, Wenling Wang, Xingwang Li, Bo Yang, Jingdong Song, Xiang Zhao, Baoy-  
296 ing Huang, Weifeng Shi, Roujian Lu, et al. A novel coronavirus from patients with pneumonia in  
297 china, 2019. *New England Journal of Medicine*, 2020.

## 298 A METHODS

### 299 A.1 DATA AND PREPROCESSING

300 **COVID-19 daily case data.** The COVID-19 data used in this work is the US state-level daily  
301 confirmed cases, denoted as  $D_t$  where  $t$  is date. The data is very noisy, especially in the beginning  
302 of the pandemic, due to various reasons, such as, delay in reporting, and so on. We performed the  
303 following preprocessing. For each state, we first detected the pandemic start time  $t_s$  as the first day  
304 of the first three consecutive days with non-zero daily confirmed cases. We then smoothed  $D_t$  after

305  $t_s$  by taking a moving median using a sliding window of size 7 followed by a moving average using  
306 a sliding window of size 5. In the rest of the paper,  $D_t$  refers to the preprocessed daily cases.

307 **Mobility data.** The state-level travel statistics are daily aggregates of residents' movements based  
308 on their mobile phone data, and provide information about population mobility. A trip was counted  
309 if a person stayed away from home for more than 10 minutes. The daily trips were grouped into  
310 11 categories based on their travel distances (see Figure 6 for an example). For instance, the *Dis-*  
311 *5-10* category indicates the number of trips within the range of 5-10 miles. The *Staying-at-home*  
312 category records the size of the population that did not stay away from home for more than 10  
313 minutes. In each state, the *Staying-at-home* category data was normalized by the state population,  
314 and other categories were normalized by the state population not staying at home. Each category  
315 is then standardized to represent the relative changes in mobility from the pre-pandemic level. This  
316 was done by subtracting the median pre-pandemic mobility value and then dividing the maximal  
317 pre-pandemic mobility value.

318 There exists abnormal activities across the US around the later summer 2020 when schools start and  
319 in early November 2020 when the election was held. These sudden irregular travel patterns were as-  
320 sociated with distinct yet unknown population behaviors. We suspect that the subpopulation, which  
321 exerted the abnormal travel patterns, deployed special the required protection/quarantine means and  
322 hence contributed little to the spread of COVID-19. Hence, the corresponding mobility data should  
323 not be used without appropriate processing in training the models and making predictions. To this  
324 end, we detected outliers as samples more than three scaled median absolute deviations away from  
325 the median. Then, we conducted Principal Component Analysis on the training data and recon-  
326 structed the detected outliers with the first 4 principle components. Figure 7 shows an example of  
327 outlier detection and reconstruction in the mobility data category  $Dis > 500$  of the New York and  
328 California states.

329 **State restriction policy.** We considered the state-level mask wearing policy and restaurant opening  
330 policy as two binary variables. If a policy is instated, the value of its variable is 1, otherwise 0.

331 **Demographic information.** The following state-level demographic information, which was also  
332 used in Yang et al. (2020a): (i) local population density, (ii) local age structure (non-overlapping age  
333 groups), (iii) local race structure (different race categories).

## 334 A.2 REGRESSION MODEL FOR EPIDEMIC PREDICTION

335 The epidemic transmission rate in each state at time  $t$  is defined as the ratio between the state-level  
336 confirmed daily cases at  $t$  and that at  $t - 1$ , i.e.,  $r_t = D_t/D_{t-1}$ , where  $D_t$  is the number of the daily  
337 confirmed cases at time  $t$ . The transmission rate  $r_t$  can be algebraically mapped to the reproduction  
338 number in epidemiology (Fan et al., 2020). Assuming no auto-correlation in transmission rates, we  
339 first use a robust linear regression technique (Holland & Welsch, 1977) to estimate the logarithm of  
340 the state-level transmission rate (i.e.,  $\log \hat{r}_{t+\Delta t}$ ) using the mobility statistics and policies at time  $t$ ,  
341 where the hyper-parameter  $\Delta t$  specifies how far in the future a prediction is made and its optimal  
342 value can be adjusted using ten-fold cross-validation. Assuming prediction starts at time  $t_p$ , the  
343 logarithm of the predicted daily cases  $\hat{D}_{t+m}$ , where  $m \leq \Delta t$ , can be derived using the estimated  
344 transmission rates as follows:

$$\log \hat{D}_{t_p+m} = \log D_{t_p-1} + \sum_{k=1}^m \log \hat{r}_{t_p+k} \quad (1)$$

345 where  $D_{t_p-1}$  is the ground-truth number of the daily cases at time  $t_p - 1$ .

## 346 A.3 CALIBRATING THE FORECAST

347 The above regression model assumes stationary relationships between the transmission rate variable  
348 and the predictors (i.e., population mobility and policies), which is not necessarily true in reality. For  
349 example, it is well known that population behaviors (e.g., awareness of conditions relating to public  
350 health, compliance to policies, etc.) vary over time, which can contribute to changes in transmission  
351 rates. Moreover, the reporting error associated with the daily confirmed cases (i.e.,  $D_{t_p-1}$  in eq.  
352 1) and the accumulated prediction error in  $\hat{r}_{t+k}$  can degenerate the predictions of the daily cases.

353 Hence, we introduce a calibration step that uses the data in a short window immediately preceding  
 354 the forecast window (see Figure 1) to make adjustments. This step makes a reasonable assumption  
 355 that the relationships between the transmission rate variable and its predictors remain unchanged  
 356 over a short time period composed of the calibration and forecast windows. Assume prediction  
 357 should start at time  $t_p$ , we use the time window  $[t_{p-k}, t_{p-1}]$  to linearly calibrate the model trained  
 358 by using the data up to  $t_{p-1}$  as

$$\log \tilde{D}_{t_c} = a \sum_{m=t_p-k}^{t_c} \log \hat{r}_m + b + \log D_{t_p-k-1} \quad (2)$$

359 where  $t_c \in [t_{p-k}, t_{p-1}]$ ,  $\hat{r}_m$  is the output of the pre-calibrated model, and  $a$  &  $b$  are two calibration  
 360 parameters. The hyper-parameter  $k$  controls the attention span of the calibration step. A small  $k$   
 361 direct the calibration step to focus on short-term epidemic trends, and vice versa. The parameter  $a$   
 362 accounts for the time-changing relationship between the transmission rate and its predictors, and  $b$   
 363 accounts for both the uncertainty associated with  $D_{t_p-k-1}$  and the error in forecasting  $r_t$ . These  
 364 two parameters can be solved by optimizing

$$\begin{aligned} a^*, b^* = \operatorname{argmin}_{a, b} & \sum_{t_c=t_p-k}^{t_{p-1}} [\log \tilde{D}_{t_c} - \log D_{t_c}]^2 \\ \text{s.t.} & |a - 1| \leq \delta \end{aligned} \quad (3)$$

365 where  $\delta > 0$  controls the maximal scaling effect to prevent numerical instability in estimating  
 366  $a^*$  due to the large uncertainties associated with reports of daily cases. We set  $\delta = 0.01$  in our  
 367 experiments. After calibration, the prediction at  $t \geq t_p$  should be calculated as  $\log \hat{D}_t = \log \tilde{D}_{t_{p-1}} +$   
 368  $a \sum_{m=t_p}^t \log \hat{r}_m$ , where  $\hat{r}_m$  is the  $\Delta t$ -step-ahead prediction made by the pre-calibrated model.

369 B ADDITIONAL RESULTS

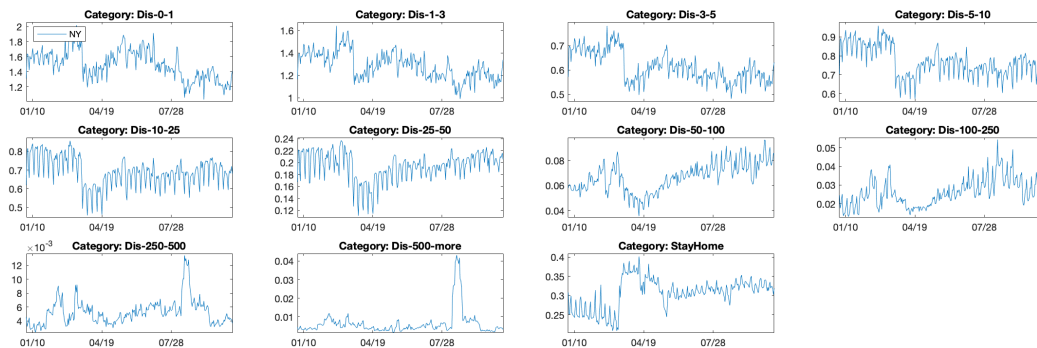

Figure 6: The normalized mobility data of the New York state. There are 11 categories based on the travel distances. The normalization procedure is explained in Section A.1.

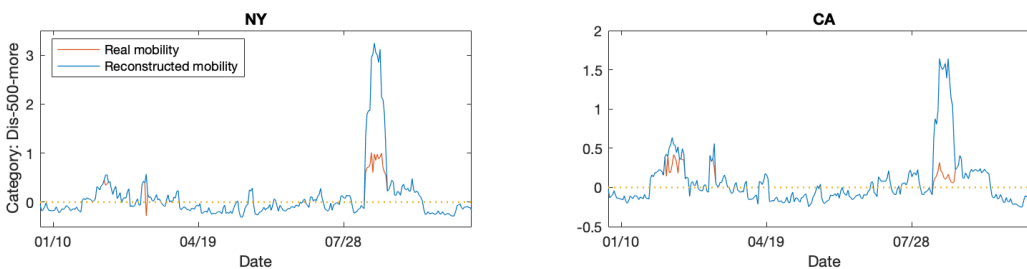

Figure 7: There is a national spike of long-distance travels (the  $Dis > 500$  mobility category) in mid-August, which might be associated with the starts of schools/universities. The data of two states (NY and CA) are shown as examples. The abnormal mobility samples are "corrected" using Principal Component Analysis as described in Section A.1.

Table 1: Regression Table on baseline transmission rates

|                                | Estimate | SE       | tStat   | pValue    |
|--------------------------------|----------|----------|---------|-----------|
| (Intercept)*                   | 0.63678  | 0.20508  | 3.1051  | 0.0032527 |
| Top-density                    | 0.013506 | 0.006005 | 2.2492  | 0.029331  |
| Adults-35-54                   | 1.4687   | 0.8757   | 1.6771  | 0.1003    |
| Hispanic-Or-Latino             | 0.21254  | 0.080443 | 2.6421  | 0.011223  |
| AmericanIndian-Or-AlaskaNative | -0.21076 | 0.14421  | -1.4614 | 0.1507    |

\* This is the intercept of regression on demographics.  
 Number of observations: 51, Error degrees of freedom: 46  
 Root Mean Squared Error: 0.0519  
 R-squared: 0.421, Adjusted R-Squared: 0.391  
 F-statistic vs. constant model: 5.34, p-value = 1.83e-05

Preprint.

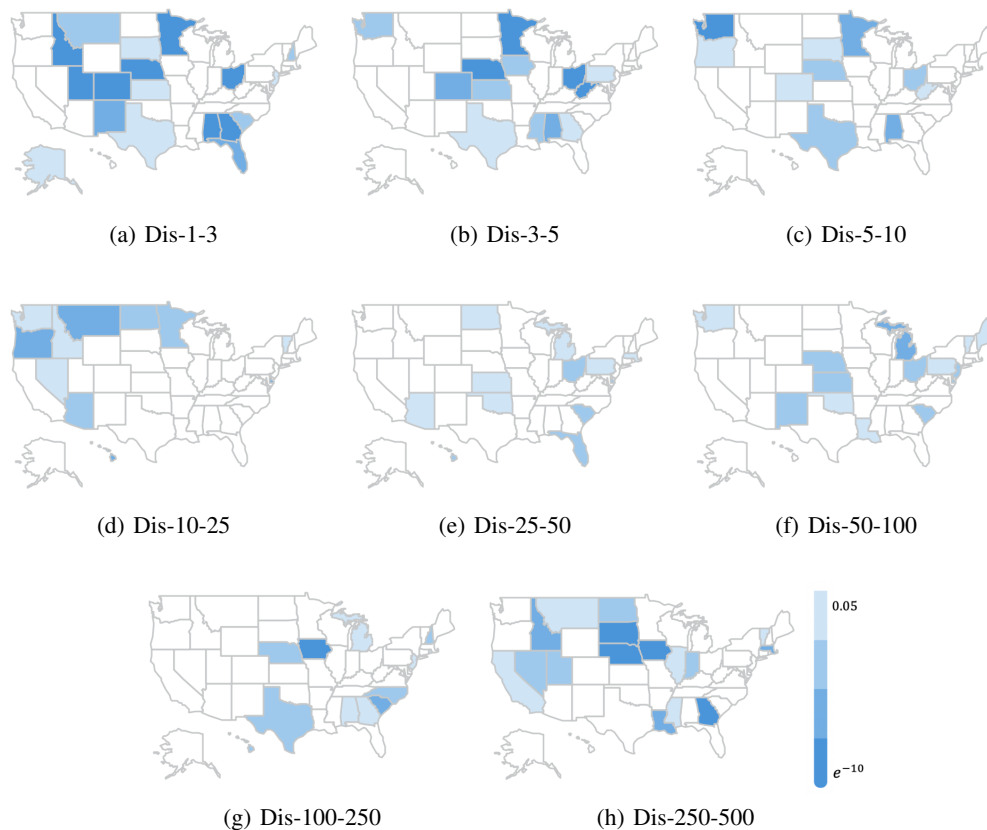

Figure 8: The regression  $p$ -value heatmaps of the mobility data categories.

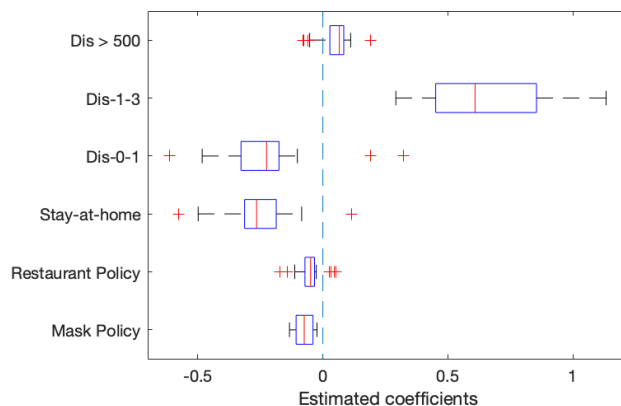

Figure 9: The most generic significant factors identified by our approach (see Figure 4(a)) as well as their descriptive statistics of estimated coefficients, according to 51 state-level regression models. Only coefficients with significant level of 0.05 are included in the box plot. The coefficients of *Mask Policy*, *Restaurant Policy*, *Stay-at-home* and *Dis-0-1* almost take negative values, showing stable negative correlations with the transmissions rates and indicating that they help prevent the spread of COVID-19. In contrast, the coefficients of *Dis-1-3* and *Dis>500* almost take positive values, showing stable positive correlations with the transmissions rates and indicating that frequent short-distance travels and cross-state travels help promote the spread.

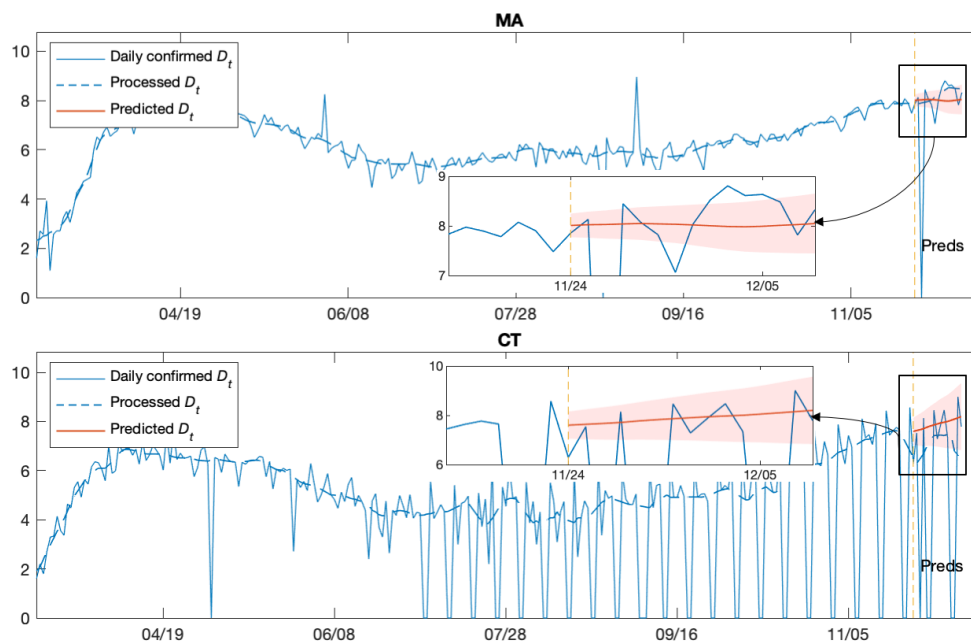

Figure 10: Two representative cases show that the trained models can forecast the trends very well even though they have relatively large prediction nRMSE and RALE: MA (nRMSE = 0.0394, RALE = 0.0253) and CT (nRMSE = 0.1353, RALE = 0.1216). These large nRMSE/RALE values are due to the delays or skips in reporting the COVID-19 daily confirmed cases by the corresponding states. These results indeed indicate the robustness and reliability of our approach. The  $x$ -axis indicate time. The  $y$ -axes indicate the logarithm of the daily confirmed cases. The yellow dash vertical lines indicate the starts of the prediction periods. The blowouts highlight the predictions. The red shaded areas indicate the 95% confidence intervals.

Table 2: The nRMSE and RALE values of the 3-, 7-, 10-, 14-day state-level predictions.

| State | nRMSE  |        |         |         | RALE   |        |         |         |
|-------|--------|--------|---------|---------|--------|--------|---------|---------|
|       | 3 days | 7 days | 10 days | 14 days | 3 days | 7 days | 10 days | 14 days |
| AK    | 0.0043 | 0.0074 | 0.0067  | 0.0112  | 0.0036 | 0.0066 | 0.0060  | 0.0092  |
| AL    | 0.0289 | 0.0282 | 0.0235  | 0.0212  | 0.0284 | 0.0271 | 0.0204  | 0.0187  |
| AR    | 0.0433 | 0.0410 | 0.0345  | 0.0294  | 0.0422 | 0.0390 | 0.0246  | 0.0139  |
| AZ    | 0.0104 | 0.0217 | 0.0301  | 0.0352  | 0.0068 | 0.0180 | 0.0256  | 0.0314  |
| CA    | 0.0042 | 0.0062 | 0.0179  | 0.0278  | 0.0041 | 0.0005 | 0.0095  | 0.0192  |
| CO    | 0.0665 | 0.0831 | 0.0943  | 0.1108  | 0.0662 | 0.0817 | 0.0920  | 0.1069  |
| CT    | 0.1779 | 0.1219 | 0.1041  | 0.1353  | 0.1766 | 0.1131 | 0.0978  | 0.1216  |
| DC    | 0.0028 | 0.0135 | 0.0470  | 0.0800  | 0.0028 | 0.0028 | 0.0256  | 0.0549  |
| DE    | 0.0253 | 0.0273 | 0.0294  | 0.0340  | 0.0253 | 0.0272 | 0.0290  | 0.0331  |
| FL    | 0.0192 | 0.0181 | 0.0169  | 0.0224  | 0.0187 | 0.0175 | 0.0162  | 0.0208  |
| GA    | 0.0298 | 0.0255 | 0.0317  | 0.0396  | 0.0293 | 0.0203 | 0.0014  | 0.0150  |
| HI    | 0.0306 | 0.0505 | 0.0486  | 0.0417  | 0.0284 | 0.0468 | 0.0459  | 0.0380  |
| IA    | 0.0706 | 0.0865 | 0.0933  | 0.1139  | 0.0698 | 0.0851 | 0.0918  | 0.1096  |
| ID    | 0.0110 | 0.0079 | 0.0084  | 0.0087  | 0.0110 | 0.0069 | 0.0021  | 0.0009  |
| IL    | 0.0287 | 0.0326 | 0.0296  | 0.0282  | 0.0281 | 0.0320 | 0.0288  | 0.0275  |
| IN    | 0.0365 | 0.0450 | 0.0460  | 0.0492  | 0.0359 | 0.0441 | 0.0453  | 0.0484  |
| KS    | 0.0534 | 0.0424 | 0.0446  | 0.0399  | 0.0529 | 0.0365 | 0.0103  | 0.0048  |
| KY    | 0.0089 | 0.0164 | 0.0202  | 0.0193  | 0.0080 | 0.0075 | 0.0134  | 0.0143  |
| LA    | 0.1211 | 0.0977 | 0.0820  | 0.0755  | 0.1208 | 0.0938 | 0.0758  | 0.0710  |
| MA    | 0.0157 | 0.0158 | 0.0318  | 0.0394  | 0.0155 | 0.0028 | 0.0135  | 0.0253  |
| MD    | 0.0149 | 0.0159 | 0.0134  | 0.0116  | 0.0148 | 0.0156 | 0.0115  | 0.0067  |
| ME    | 0.0153 | 0.0147 | 0.0201  | 0.0305  | 0.0152 | 0.0146 | 0.0187  | 0.0267  |
| MI    | 0.0213 | 0.0178 | 0.0193  | 0.0208  | 0.0211 | 0.0174 | 0.0189  | 0.0204  |
| MN    | 0.0310 | 0.0470 | 0.0596  | 0.0771  | 0.0308 | 0.0448 | 0.0559  | 0.0710  |
| MO    | 0.0463 | 0.0534 | 0.0526  | 0.0536  | 0.0457 | 0.0528 | 0.0522  | 0.0533  |
| MS    | 0.0153 | 0.0202 | 0.0298  | 0.0326  | 0.0134 | 0.0066 | 0.0181  | 0.0241  |
| MT    | 0.0242 | 0.0263 | 0.0332  | 0.0411  | 0.0241 | 0.0260 | 0.0320  | 0.0390  |
| NC    | 0.0146 | 0.0212 | 0.0187  | 0.0159  | 0.0137 | 0.0201 | 0.0168  | 0.0133  |
| ND    | 0.0231 | 0.0260 | 0.0332  | 0.0364  | 0.0231 | 0.0256 | 0.0318  | 0.0348  |
| NE    | 0.0314 | 0.0412 | 0.0515  | 0.0810  | 0.0310 | 0.0402 | 0.0487  | 0.0714  |
| NH    | 0.0271 | 0.0189 | 0.0157  | 0.0143  | 0.0266 | 0.0166 | 0.0121  | 0.0055  |
| NJ    | 0.0260 | 0.0331 | 0.0331  | 0.0322  | 0.0257 | 0.0324 | 0.0325  | 0.0317  |
| NM    | 0.0089 | 0.0206 | 0.0225  | 0.0294  | 0.0069 | 0.0177 | 0.0203  | 0.0262  |
| NV    | 0.0159 | 0.0240 | 0.0286  | 0.0338  | 0.0155 | 0.0228 | 0.0271  | 0.0319  |
| NY    | 0.0090 | 0.0072 | 0.0102  | 0.0105  | 0.0090 | 0.0053 | 0.0007  | 0.0036  |
| OH    | 0.0322 | 0.0417 | 0.0448  | 0.0480  | 0.0319 | 0.0408 | 0.0439  | 0.0470  |
| OK    | 0.0303 | 0.0530 | 0.0546  | 0.0518  | 0.0279 | 0.0488 | 0.0516  | 0.0497  |
| OR    | 0.0058 | 0.0142 | 0.0148  | 0.0132  | 0.0049 | 0.0123 | 0.0134  | 0.0116  |
| PA    | 0.0423 | 0.0512 | 0.0519  | 0.0525  | 0.0420 | 0.0504 | 0.0511  | 0.0518  |
| RI    | 0.0592 | 0.0551 | 0.0596  | 0.1206  | 0.0591 | 0.0549 | 0.0592  | 0.0992  |
| SC    | 0.0097 | 0.0098 | 0.0275  | 0.0484  | 0.0093 | 0.0020 | 0.0126  | 0.0315  |
| SD    | 0.0660 | 0.0839 | 0.0900  | 0.1130  | 0.0649 | 0.0820 | 0.0883  | 0.1075  |
| TN    | 0.0160 | 0.0156 | 0.0144  | 0.0127  | 0.0160 | 0.0155 | 0.0143  | 0.0120  |
| TX    | 0.0278 | 0.0241 | 0.0229  | 0.0264  | 0.0278 | 0.0239 | 0.0228  | 0.0257  |
| UT    | 0.0423 | 0.0332 | 0.0299  | 0.0281  | 0.0423 | 0.0290 | 0.0140  | 0.0029  |
| VA    | 0.0042 | 0.0157 | 0.0148  | 0.0172  | 0.0011 | 0.0119 | 0.0111  | 0.0017  |
| VT    | 0.0635 | 0.0589 | 0.0605  | 0.0747  | 0.0632 | 0.0549 | 0.0199  | 0.0165  |
| WA    | 0.0073 | 0.0058 | 0.0076  | 0.0177  | 0.0071 | 0.0018 | 0.0019  | 0.0098  |
| WI    | 0.0328 | 0.0403 | 0.0418  | 0.0423  | 0.0325 | 0.0397 | 0.0412  | 0.0418  |
| WV    | 0.0439 | 0.0485 | 0.0508  | 0.0535  | 0.0434 | 0.0480 | 0.0503  | 0.0531  |
| WY    | 0.0681 | 0.0933 | 0.1049  | 0.1285  | 0.0671 | 0.0902 | 0.1014  | 0.1224  |
